# Supplementary material for: Interaction of imidazolium based ionic liquids with Triton X-100 micelles: investigating the role of the counter ion and chain length
Source: Royal Society of Chemistry journal article supplement (doi:10.1039/c6ra03086f), 2016-01-01
Supplement: c6ra03086f1.pdf [file c6ra03086f1.pdf]

Supplementary material:

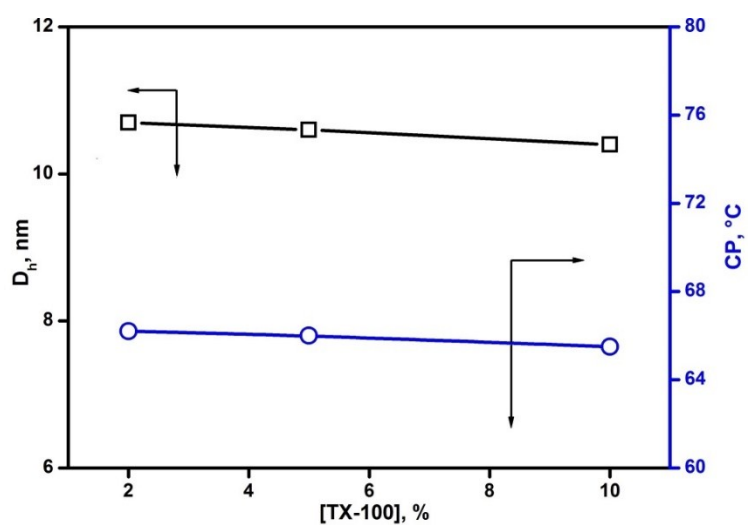

SM1: Effect of concentration on (○) CP and (□) D<sub>h</sub> of TX-100 micelles

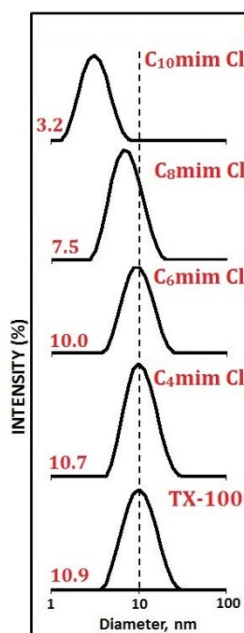

SM2: Size distribution curve for 5% TX-100 in the presence of 20 mM C<sub>n</sub>mim Cl (n=4,6,8 and 10) ILs at 30°C

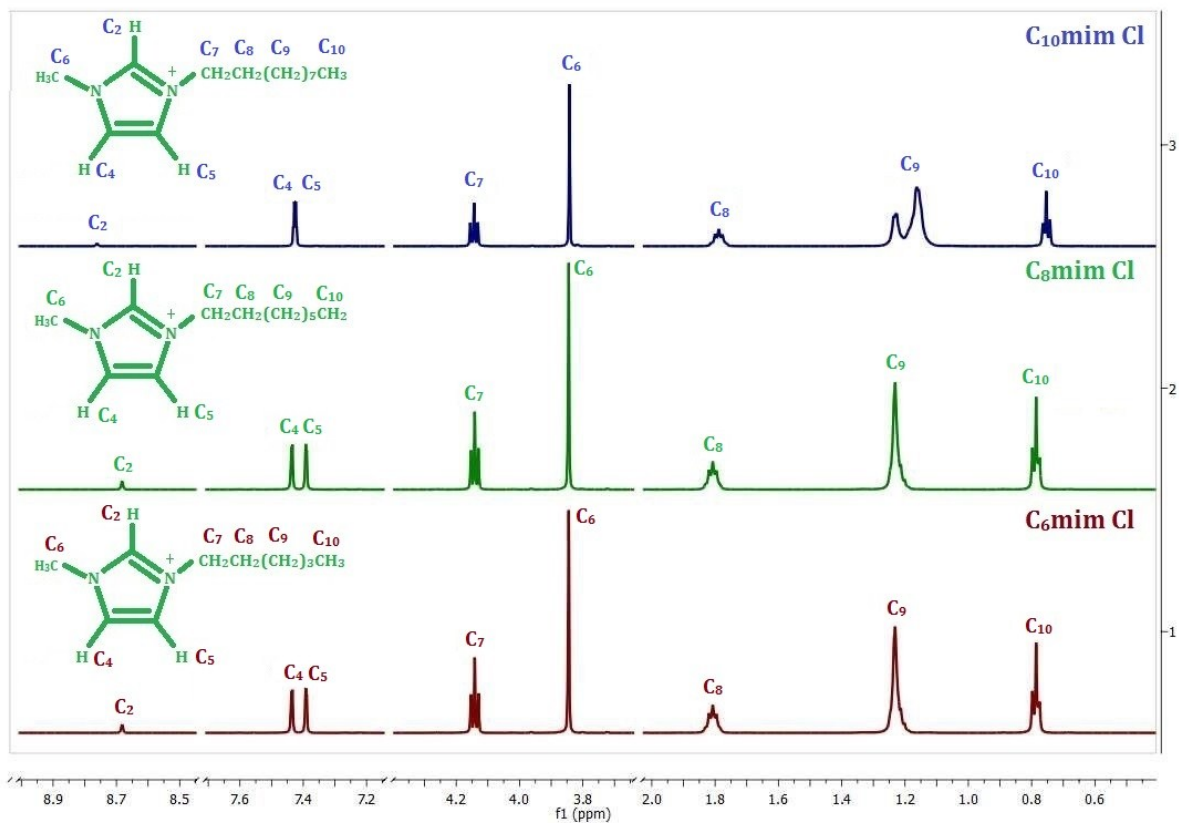

SM3:  $^1\text{H}$  NMR Spectra of  $\text{C}_n\text{mim Cl}$  in  $\text{D}_2\text{O}$  at  $30\text{ }^\circ\text{C}$
